# Supplementary material for: Gaseous Mercury Limit Values: Definitions, Derivation, and the Issues Related to Their Application
Source: MDPI journal article supplement (doi:10.3390/su16083142), 2024-04-10
Supplement: s1 [file s1]

Archive with 1 entries (1 files):
- sustainability-2927702-supplementary.pdf
